# Supplementary material for: miR-9a modulates maintenance and ageing of Drosophila germline stem cells by limiting N-cadherin expression
Source: PubMed Central journal article supplement (PMC5605507; doi:10.1038/s41467-017-00485-9), 2017-09-19
Supplement: 41467_2017_485_MOESM2_ESM.pdf [file 41467_2017_485_MOESM2_ESM.pdf]

Title: Supplementary Information

Description: Supplementary Figures

Title: Peer Review File

Description:

## Supplementary Information

### Supplementary figures

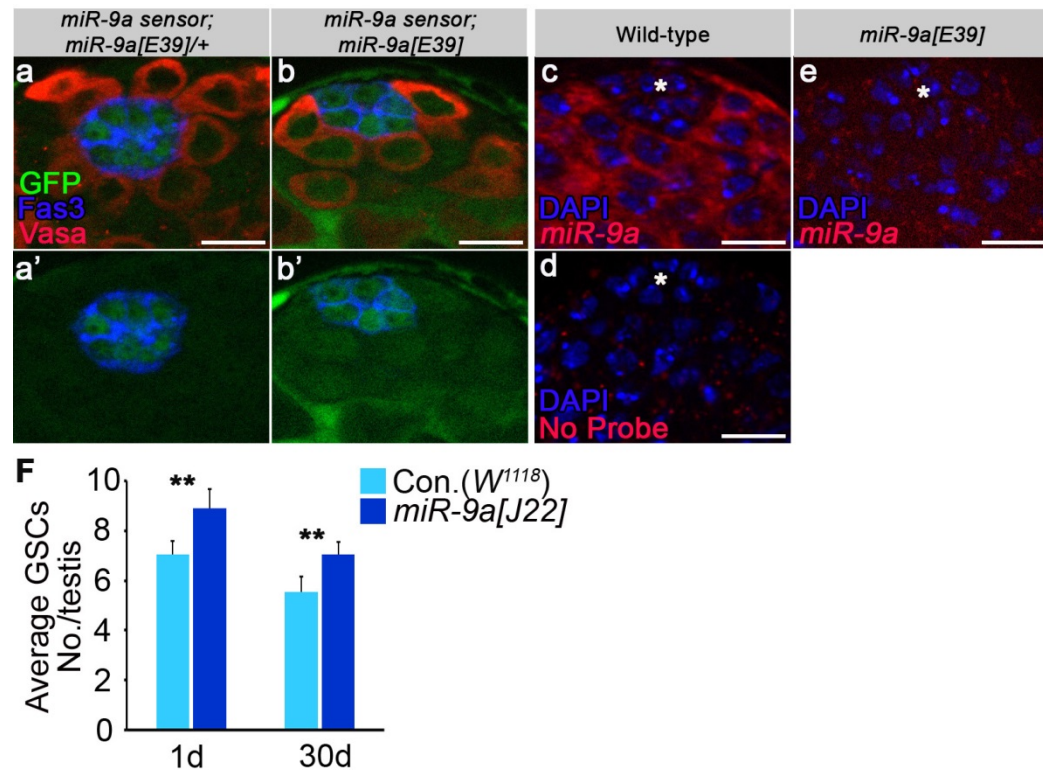

**Supplementary Figure 1: *miR-9a* is expressed in GSCs and spermatogonia cells.** (a-b') Representative images of testis immunostained for Vasa (red), Fas3 (blue) and detected for GFP (green). (a,a') Control: *miR-9a* GFP sensor expressed in heterozygous *miR-9a* mutants (*miR-9a sensor;miR9a[E39]/+*) shows GFP expression in the hub and lack of GFP in GSCs and spermatogonia. (b,b') *miR-9a* GFP sensor expresses GFP in GSCs and spermatogonia of *miR-9a* mutants (*miR-9a sensor;miR9a[E39]*). (c-e) FISH for *miR-9a* (red) and DAPI (blue) Asterisks mark the hub. (c,d) Testis of wild-type (*w<sup>1118</sup>*) (d) FISH control without probe. (e) FISH control of testis from *miR9a[E39]* null mutants. Scale-bars, 10 $\mu$ m. (f) Shown are average number of GSCs per testis along with 95% confidence interval (error bars). The total number of testes scored: con. (*w<sup>1118</sup>*) 1-day ( $n=26$ ), 30-days ( $n=34$ ); *miR-9a[J22]* 1-day ( $n=27$ ), 30-days ( $n=24$ ). Statistical significance was determined as in Fig. 1d. P values \*\*  $\leq 0.005$  in young and aged *miR-9a[J22]* compared to con. (*w<sup>1118</sup>*).

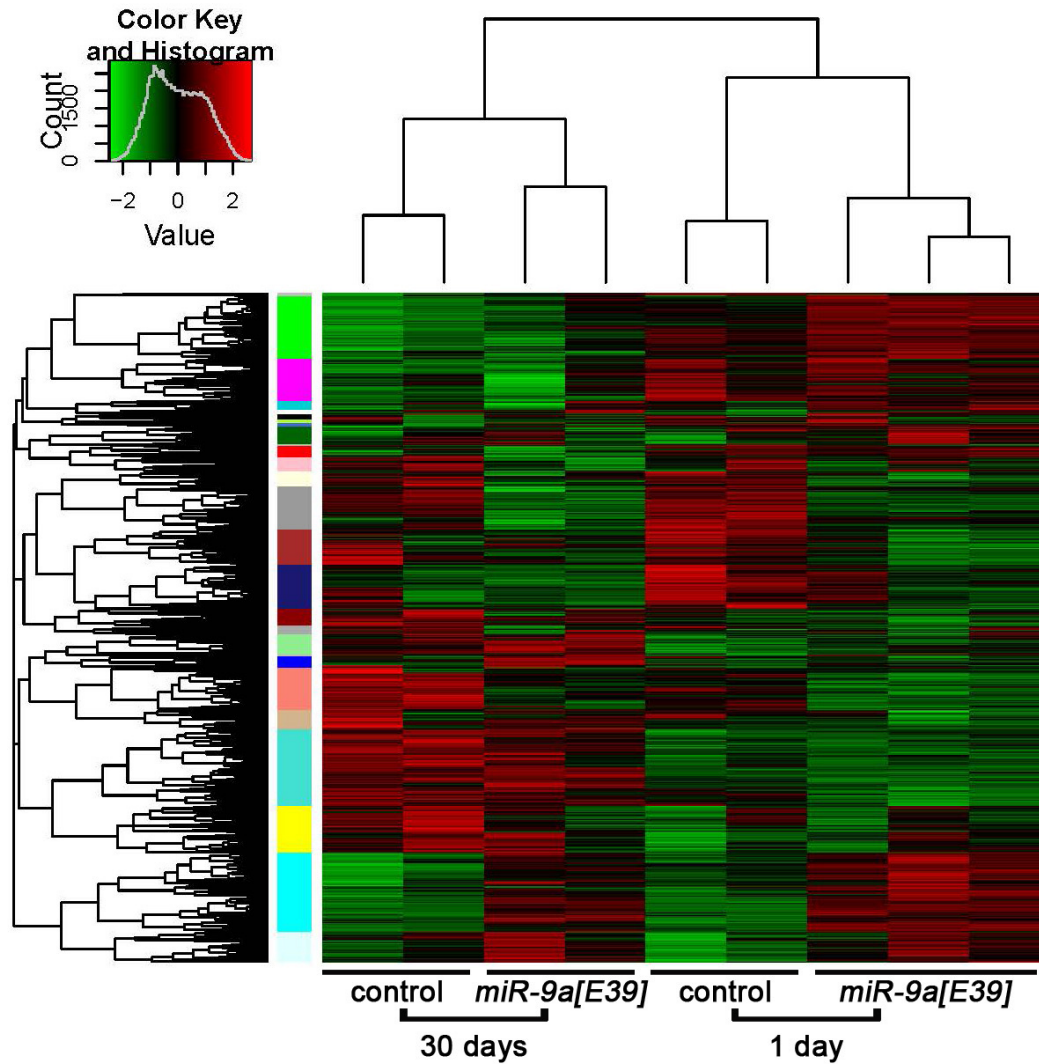

**Supplementary Figure 2: Heatmap clustering of transcriptome analysis.**

Differentially expressed *Drosophila* genes from testes of: 1- and 30-days old control ( $w^{1118}$ ) and *miR-9a[E39]* mutants. The heatmap color values correspond to the z-scores of RNA-Seq CPM values; Horizontal axis: clustering by samples; Vertical axis: clustering by genes, where each color strip represents a clade of similarly expressed genes. Note clustering of biological repeats and age.

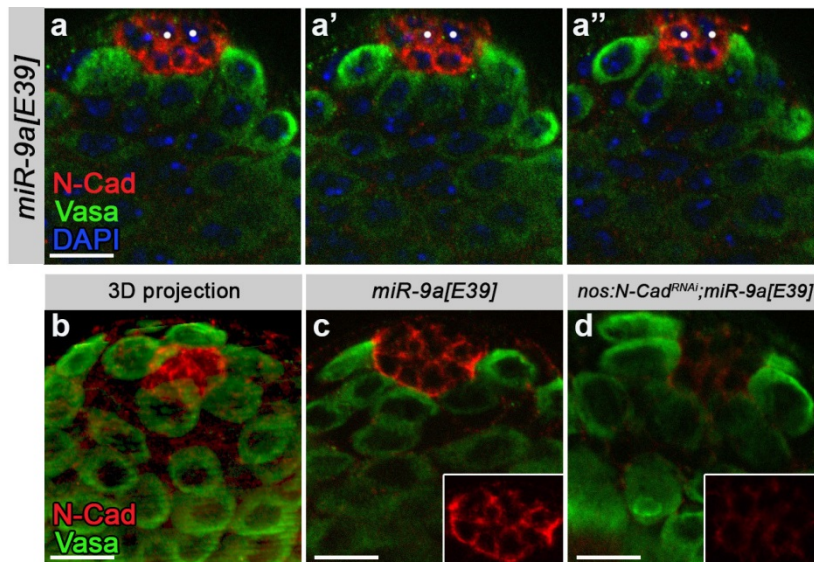

**Supplementary Figure 3: Most hub cells form adherent junction with GSCs. (a-a'')** Z-sections (1 $\mu$ m intervals) of *miR9a[E39]* niche stained with N-Cad (red), Vasa (green) and DAPI (blue; 3b image). White dots mark hub cells unconnected to GSCs present in section a, but connect the GSCs present in section a'' indicating that GSCs pile around the hub in multiple layers. **(b)** 3D projection of 10 Z-stacks showing the spherical structure of the GSCs niche (7 GSCs). **(c-d)** Representative images of testes taken at the same exposure time from *miR-9a[E39]* mutants (b, n=20) and from N-Cad<sup>RNAi</sup> in GSCs and progenitor germ cells of *miR-9a[E39]* mutants (c, *nos-GAL4,UAS-N-cad<sup>RNAi</sup>;miR-9a[E39]*, n=16) immunostained for N-cad (red) and Vasa (green). Note overall reduction in N-Cad expression when *N-cad<sup>RNAi</sup>* is driven in GSCs. Scale-bars, 10  $\mu$ m.

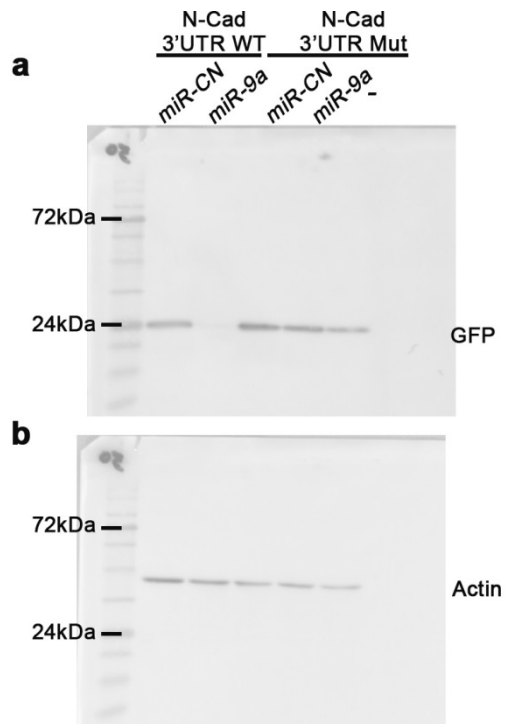

**Supplementary Figure 4: *miR-9a* downregulates GFP-*N-cad*-3'UTR reporter via two recognition sites.** Experimental design is described in legend to Fig. 3e. This uncropped blot displays levels of GFP protein (**a**) and actin (**b**).
